# 1 Reconstructing genomes of carbon monoxide oxidisers in volcanic 2 deposits including members of the class Ktedonobacteria

3  
4 **Marcela Hernández**<sup>1,2,6,\*</sup>, **Blanca Vera-Gargallo**<sup>3</sup>, **Marcela Calabi-Floody**<sup>4</sup>, **Gary M King**<sup>5</sup>, **Ralf**  
5 **Conrad**<sup>6</sup> and **Christoph C. Tebbe**<sup>1</sup>

6  
7 <sup>1</sup> Thünen Institut für Biodiversität, Braunschweig, Germany, [christoph.tebbe@thuenen.de](mailto:christoph.tebbe@thuenen.de);

8 <sup>2</sup> School of Environmental Sciences, Norwich Research Park, University of East Anglia, Norwich, UK,  
9 [marcela.hernandez@uea.ac.uk](mailto:marcela.hernandez@uea.ac.uk);

10 <sup>3</sup> Department of Microbiology and Parasitology, Faculty of Pharmacy, University of Seville, Seville, Spain,  
11 [vera@us.es](mailto:vera@us.es);

12 <sup>4</sup> BIOREN-UFRO, Universidad de La Frontera, Temuco, Chile; [marcela.calabi@ufrontera.cl](mailto:marcela.calabi@ufrontera.cl);

13 <sup>5</sup> Department of Biological Sciences, Louisiana State University, Baton Rouge, LA, USA;  
14 [gkingme@gmail.com](mailto:gkingme@gmail.com);

15 <sup>6</sup> Max Planck Institute for Terrestrial Microbiology, Marburg, Germany, [conrad@mpi-marburg.mpg.de](mailto:conrad@mpi-marburg.mpg.de);

16  
17 \* Correspondence: [marcela.hernandez@uea.ac.uk](mailto:marcela.hernandez@uea.ac.uk) (M.H.)

18  
19 **Abstract:** Microorganisms can potentially colonize volcanic rocks using the chemical energy in  
20 reduced gases such as methane, hydrogen (H<sub>2</sub>) and carbon monoxide (CO). In this study, we  
21 analysed soil metagenomes from Chilean volcanic soils, representing three different successional  
22 stages with ages of 380, 269 and 63 years, respectively. A total of 19 metagenome-assembled  
23 genomes (MAGs) were retrieved from all stages with a higher number observed in the youngest soil  
24 (1640: 2 MAGs, 1751: 1 MAG, 1957: 16 MAGs). Genomic similarity indices showed that several  
25 MAGs had amino-acid identity (AAI) values >50% to the phyla Actinobacteria, Acidobacteria,  
26 Gemmatimonadetes, Proteobacteria and Chloroflexi. Three MAGs from the youngest site (1957)  
27 belonged to the class Ktedonobacteria (Chloroflexi). Complete cellular functions of all the MAGs  
28 were characterised, including carbon fixation, terpenoid backbone biosynthesis, formate oxidation  
29 and CO oxidation. All 19 environmental genomes contained at least one gene encoding a putative  
30 carbon monoxide dehydrogenase (CODH). Three MAGs had form I *coxL* operon (encoding the large  
31 subunit CO-dehydrogenase). One of these MAGs (MAG-1957-2.1, Ktedonobacterales) was highly  
32 abundant in the youngest soil. MAG-1957-2.1 also contained genes encoding a [NiFe]-hydrogenase  
33 and *hyp* genes encoding accessory enzymes and proteins. Little is known about the  
34 Ktedonobacterales through cultivated isolates, but some species can utilize H<sub>2</sub> and CO for growth.  
35 Our results strongly suggest that the remote volcanic sites in Chile represent a natural habitat for  
36 Ktedonobacteria and they may use reduced gases for growth.

37  
38  
39 **Keywords:** Ktedonobacteria; carbon monoxide dehydrogenase; metagenome-assembled-genome;  
40 volcanic soils; shotgun sequencing

41

42

43

44

## 45 1. Introduction

46 Volcanic eruptions provide a model for understanding soil-forming processes and the roles of  
47 pioneer bacteria during early biotic colonization. Recently, it has been demonstrated that the  
48 structure of microbial communities can play a key role in the direction of plant community succession  
49 pathways [1]. This is due in part to bacterial contributions to weathering of volcanic rocks, which  
50 releases nutrients resulting in some of the most fertile soils in the world.

51 After lava and other volcanic deposits (i.e. ash and tephra) cool sufficiently, mineral surface  
52 areas become accessible for microbial colonization [2-5]. In fact, microbes, and especially bacteria, are  
53 among the first colonizers of volcanic deposits and thereby initiate soil formation during the early  
54 stages of terrestrial ecosystem development [6-12]. While methane (CH<sub>4</sub>), hydrogen sulfide (H<sub>2</sub>S),  
55 hydrogen (H<sub>2</sub>), and carbon monoxide (CO) have been proposed to promote bacterial colonization  
56 and support microbial life in these organic-carbon deficient environments [13,14], the actual carbon  
57 and energy sources of the first colonizers remain elusive, but likely include a range of endogenous  
58 and exogenous sources, including reduced minerals and gases. The microbial ability to utilize these  
59 substrates for growth, and thereby initiate the formation of soil organic material, depends on  
60 specialized enzymes which may not be prevalent in many different microbial groups, thus  
61 representing a limited phylogenetic distribution. As a consequence, this could constrain the  
62 composition of pioneering microbial communities.

63 CO is a potential source of carbon and energy for microbes pioneering the colonization of  
64 volcanic substrates. CO utilization under oxic conditions requires a molybdenum-dependent carbon  
65 monoxide dehydrogenase (Mo-CODH), which catalyses the oxidation of CO to CO<sub>2</sub> [15]. Surveys of  
66 genome databases (e.g., Integrated Microbial Genomes) reveal that Mo-CODHs occur in  
67 Proteobacteria, Actinobacteria, Firmicutes, Chloroflexi, Bacteroidetes, Deinococcus-Thermus,  
68 Halobacteria, and Sulfolobales among others. They were originally described as inducible enzymes  
69 and have subsequently been shown to be up-regulated by carbon limitation during growth of  
70 Actinobacteria (e.g., *Rhodococcus* and *Mycobacterium smegmatis* [15-17], and Chloroflexi (e.g.,  
71 *Thermogemmatispora* and *Thermomicrobium* [18]). Mo-CODH has been previously targeted in  
72 molecular ecological studies of CO oxidizers in volcanic systems and other extreme environments  
73 [15]. These studies have revealed changes in community composition with the age and  
74 developmental status of individual sites [7,15]. The results suggest that CO-oxidizing communities  
75 are not static, but that they change in response to changing environmental conditions, and possibly  
76 affect the direction of changes.

77 In a preceding study, we identified the microbial communities involved in volcanic soil  
78 formation in different sites on Llaima Volcano (Chile). The bacterial communities of soils from 3 sites  
79 affected by lava deposition in 1640, 1751 and 1957 were analysed using 16S rRNA gene amplicon  
80 sequencing [19] and it was demonstrated that microbial diversity increased with the age of the soil  
81 deposits. Interestingly, bacterial phylotypes of the poorly studied Ktedonobacterales were among the  
82 predominant community members in the 1957 soil, representing 37% of all OTUs, as compared with  
83 18% in the 1751 and 7% in the 1640 soils. Thus, we suspected that bacteria of this order could be  
84 instrumental for the initiation of soil formation, paving the way for soil organic carbon formation and  
85 preparing a substrate for microbial colonisation and plant growth. Some already cultivated  
86 Ktedonobacterales were found to be carboxydrotrophs and hydrogenotrophs (i.e. carbon monoxide  
87 (CO) and hydrogen (H<sub>2</sub>) oxidisers/consumers) [14]. Thus, this leads to the hypothesis that CO and H<sub>2</sub>  
88 are important carbon and energy sources for early stages of microbes colonizing the Llaima Volcano  
89 soil. However, the ecophysiology of the few bacterial isolates assigned to Ktedonobacterales limits  
90 predictions about metabolic functions based on 16S rRNA gene sequences alone.

91 Therefore, in this study a metagenomic approach was chosen to identify microbial traits  
92 associated with early stages of colonization and soil formation in a volcanic ecosystem. In particular,  
93 the presence of functional genes implicated in CO-oxidation (*coxL* genes) and H<sub>2</sub>-oxidation (*hyd* and  
94 *hup* genes) was assessed from metagenome-assembled genomes (MAGs). These MAGs were  
95 retrieved from volcanic soils of different ages, representing sites 1640, 1751 and 1957. During this  
96 period, the soil formation evolved as indicated by their different levels of soil organic matter ranging

97 from  $65.33 \pm 2.31$  in the most recent soil (1957) to 9.33 % in both medium (1751) and oldest soils (1640)  
98 [20].

99 Especially the most recent soil (youngest soil) was suspected to reveal microbial adaptations to  
100 the challenging environmental conditions and thus to unveil the metabolic processes which initiate  
101 microbial colonisations. Therefore, functional metabolic modules annotated in the environmental  
102 genomes were analysed, with a main focus on the poorly characterised class of the Ktedonobacteria  
103 (Chloroflexi). Three Ktedonobacteria MAGs were obtained and all contained genes encoding CO and  
104 H<sub>2</sub> oxidation. Additional MAGs from other phyla were also found to contain these genes. Our study  
105 advances the understanding of the ecology of Ktedonobacteria and their potential to act as early  
106 colonizers in volcanic soils.

107

## 108 2. Materials and Methods

109

### 110 2.1 Sequencing

111 The DNA from the volcanic soils used in our study had been previously extracted [20]. The soil  
112 physico-chemical characteristics have been published [20] showing a pH of 5.6 in both medium and  
113 oldest soil and 4.7 in the youngest soil, and nitrogen (mg/kg) of 25 (1640), 26 (1751) and 36.33 (1957).  
114 Briefly, the soil samples originating from three different sites of different ages according to the latest  
115 lava eruption (1640, 1751, 1957, map in [20]). A total of nine samples (triplicate per site) were  
116 sequenced on an Illumina MiSeq at the Max-Planck-Genome Centre, Köln, Germany. The  
117 metagenome was analysed on a high-performance computer using 650 GB RAM and 64 cores at the  
118 Thünen Institute of Biodiversity, Braunschweig, Germany.

119

### 120 2.2. Quality control

121 The sequence reads were checked using FastQC version 0.11.8 [21]. Low quality reads were  
122 discarded using BBDuk version 38.68, quality-trimming to Q15 using the Phred algorithm [22]. A  
123 schematic overview of the steps and programs used are shown in Figure 1.

124

125

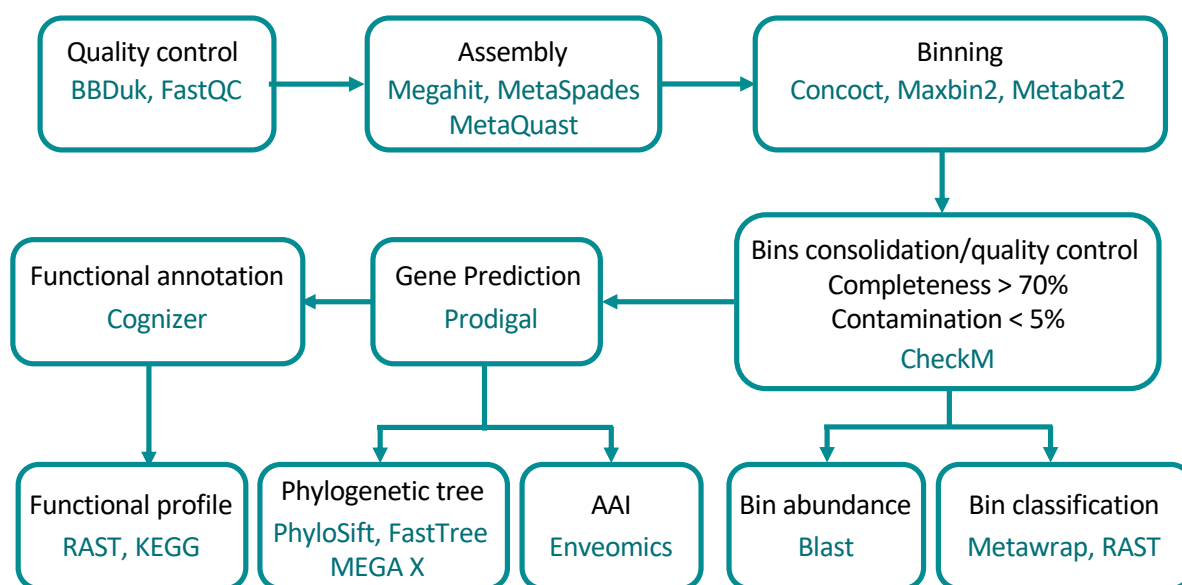

126

127

128

129

130

Figure 1. Workflow of the metagenome analysis and programs used in the present study. Binning was run by using MetaWrap package. AAI: Amino Acid Identity.

### 2.3. Metagenome assembly and binning

131 All trimmed Illumina reads were merged into longer contiguous sequences (scaffolds) using *de*  
132 *novu* assemblers Megahit version 1.2.8 [23] with k-mers 21,29,39,59,79,99,119,141 and MetaSPAdes  
133 (SPAdes for co-assembly) version 3.13.1 [24,25] with k-mers 21,31,41,51,61,71,81. Triplicate samples  
134 were co-assembled in order to improve the assembly of low-abundance organisms. Assembly quality  
135 was checked with MetaQuast version 5.0.2 [26] showing that the best quality was obtained with  
136 MetaSPAdes for our samples (data not shown). Downstream analysis was carried out using the  
137 scaffolds retrieved from MetaSPAdes. Krona charts [27] were recovered from MetaQuast runs to  
138 identify taxonomic profiles. Downstream binning analysis was performed with two sets of scaffolds:  
139 full size scaffolds and scaffolds larger than 1000 bp.

140 Metagenomic binning of the assembled scaffolds was carried out with the metaWRAP version  
141 1.2.1 pipeline [28], which binning module employs three binning software programs: MaxBin2 [29],  
142 metaBAT2 [30], and CONCOCT [31]. Completion and contamination metrics of the extracted bins  
143 were estimated using CheckM [32]. The resulting bins were collectively processed to produce  
144 consolidated metagenome-assembled genomes (MAGs) using the bin\_refinement module (criterion:  
145 completeness > 70%; contamination < 5%). Both sets of MAGs (18 from scaffolds larger than 1000 bp  
146 and 17 from full size scaffolds) were aggregated, visualized with VizBin [33] and then dereplicated  
147 using dRep [34]. Only the highest scoring MAG from each secondary cluster was retained in the  
148 dereplicated set. The abundance of each MAG in the different sites was calculated using BLASTN  
149 version 2.5.0+ [35] keeping only hits with >95% identity and e-value 1e-5 for the analysis [36]. A final  
150 heatmap was constructed using the function heatmap.2 from the gplots package version 3.0.4 [37] in  
151 R version 4.0.2 (<https://www.r-project.org>).

152

#### 153 2.4. Functional annotation

154 The open reading frames (ORFs) in all scaffolds of each MAG were predicted using Prodigal  
155 (v2.6.3) [38]. Functions were annotated using Cognizer [39] and KEGG annotation framework [40].  
156 The annotations of the predicted proteins from the Kyoto Encyclopedia of Genes and Genomes  
157 (KEGG) were used to confirm protein functional assignment and identify pathways. Complete  
158 pathways were identified using KEGG BRITE pathway mapping [40]. Aerobic carbon-monoxide  
159 dehydrogenases and hydrogen dehydrogenase were also identified using KEGG ortholog  
160 annotations; CODH was further distinguished as form I and form II (putative CODH) based on active  
161 site motifs present in *coxL* genes (e.g., [41]).

162

#### 163 2.5. Phylogenomic analysis

164 Taxonomic classification of MAGs was performed using the classify\_bins module from  
165 metaWRAP which relies on NCBI\_nt database. MAGs were also screened using the RAST Server  
166 (Rapid Annotations using Subsystems Technology; [42,43]), which also allowed to retrieve  
167 information regarding close relative genomes in order to construct the phylogenetic tree.

168 To estimate intergenomic similarity, amino-acid comparisons between MAGs and their closest  
169 relative genomes present in the databases were calculated based on reciprocal best hits (two-way  
170 AAI) using the enveomics collection (<http://enve-omics.gatech.edu/> [44]).

171 The phylogenetic affiliation of MAGs was determined by constructing a genomic tree using  
172 FastTree version 2.1.11 [45]. Reference genomes were manually downloaded from the National  
173 Center for Biotechnology Information (NCBI) Refseq database (Table S1). Conserved genes from the  
174 extracted bins and the reference genomes were concatenated using Phylosift version 1.0.1 [46].

175 Phylogenetic analysis of the large sub-unit CO dehydrogenase gene (*coxL*) using the Maximum  
176 Likelihood method with a JTT matrix-based model [47] was performed. Bootstrap values (100  
177 replicates) are shown where support  $\geq 70$  percent. The scale bar indicates substitutions per site. All  
178 gapped positions were deleted resulting in 420 positions in the final dataset. Evolutionary analyses  
179 were conducted in MEGA X [48,49].

180

#### 181 2.6. Accession number

182 Raw metagenomic data and environmental genomes derived from binning processes were  
183 deposited in the Sequence Read Archive (SRA) under the bioproject accession number PRJNA602600  
184 for raw data and PRJNA602601 for metagenome-assembled genomes.  
185

### 186 3. Results

#### 187 3.1. MAGs recovery

188 A total of ~3-4 million scaffolds were recovered from the soil metagenomes in each site. Even  
189 though all the sites underwent similar sequencing efforts (between 2.3 GB in 1640 and 1957 to 2.4  
190 Gb in 1751), the youngest soil had the largest number of scaffolds with 499 sequences >50 kb  
191 compared to the oldest soil with only 12 scaffolds with a size >50 kb (Table 1). The youngest soil  
192 also had a larger N50 length of scaffolds and L50 compared to the other soils (Table 1). A total of 19  
193 MAGs with a completeness of >70% and a contamination <5% (2 from 1640, 1 from 1751 and 16  
194 from 1957) were retrieved and characterised.

195 **Table 1. Summary report for the assembly quality assessment using MetaQuast**

| Statistics                        | 1640       | 1751       | 1957       |
|-----------------------------------|------------|------------|------------|
| Number of scaffolds (>= 0 bp)     | 3631380    | 4047900    | 3138527    |
| Number of scaffolds (>= 500 bp)   | 1488437    | 1609020    | 1578887    |
| Number of scaffolds (>= 1000 bp)  | 326980     | 333885     | 447418     |
| Number of scaffolds (>= 25000 bp) | 172        | 195        | 1551       |
| Number of scaffolds (>= 50000 bp) | 12         | 40         | 499        |
| Total length (>= 0 bp)            | 2320437372 | 2460323814 | 2396069091 |
| Total length (>= 500 bp)          | 1385386471 | 1404094641 | 1717252425 |
| Total length (>= 1000 bp)         | 631179105  | 570404360  | 964085094  |
| Total length (>= 25000 bp)        | 5697241    | 8152100    | 82365310   |
| Total length (>= 50000 bp)        | 686375     | 2983958    | 46419897   |
| N50                               | 914        | 850        | 700        |
| L50                               | 391387     | 477193     | 348604     |

196  
197 N50 - length such that scaffolds of this length or longer include half the bases of the assembly; L50 -  
198 number of scaffolds that are longer than, or equal to, the N50 length and therefore include half the  
199 bases of the assembly (<https://www.ncbi.nlm.nih.gov/assembly/help/#globalstats>)

200

#### 201 3.2. MAG identification

202 MAGs were affiliated to the phyla Actinobacteria, Proteobacteria, Acidobacteria,  
203 Gemmatimonadetes, Chloroflexi, Firmicutes and Verrucomicrobia (Figure 2). In the oldest soil, two  
204 environmental genomes were retrieved related to Actinomycetales (Actinobacteria) and  
205 Rhodospirillales (Proteobacteria). The only MAG retrieved from the middle soil was related to  
206 Acidobacteria. MAGs binned from the youngest soil included seven assigned to Acidobacteria, one  
207 to Proteobacteria, three to Actinobacteria, one to the phylum Gemmatimonadetes, one to  
208 Verrucomicrobia and three to the phylum Chloroflexi (Figure 2).

209

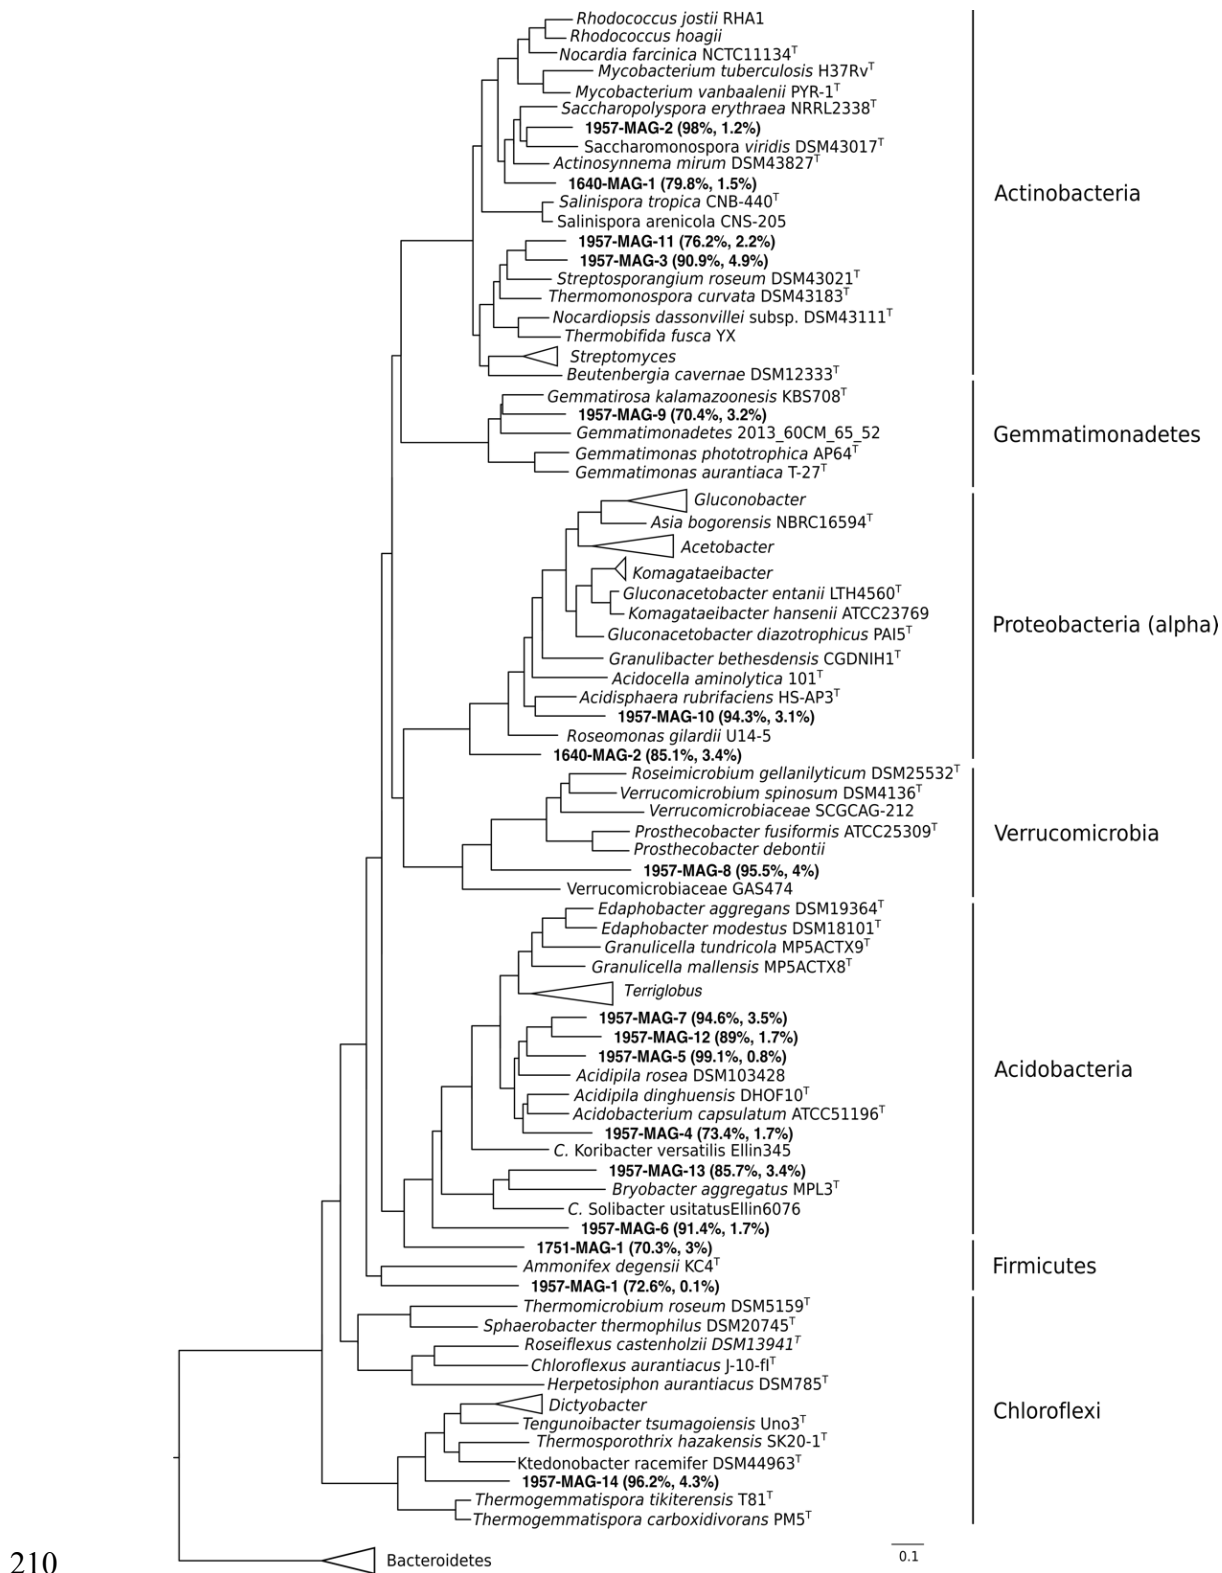

210

211 Figure 2. Phylogenomic tree of the bacterial genomic bins. The tree was built with PhyloSift against  
 212 reference genomes downloaded from NCBI. MAGs are indicated in bold together with their  
 213 respective completeness and contamination. FastTree confidence values of MAG branches are  
 214 shown. The horizontal bar represents 10% sequence divergence.

215 The abundance of the MAGs in each site was calculated by using BLASTN (Figure 3). MAGs were  
 216 more abundant from the soil they were recovered. MAGs with a total abundance >1% were found  
 217 only in the young soil (1957). MAG 1957-2.1 (Ktedonobacteria, 1.21% ± 0.82), MAG 1957-5.1

218 (Actinomycetales,  $1.02\% \pm 0.84$ ), MAG 1957-13.1 (Verrucomicrobiales,  $1.58\% \pm 1.1$ ) and MAG 1957-  
 219 16.1 (Acidobacteria,  $1.14\% \pm 0.87$ ) were the most abundant MAGs (Figure 3).

220  
 221

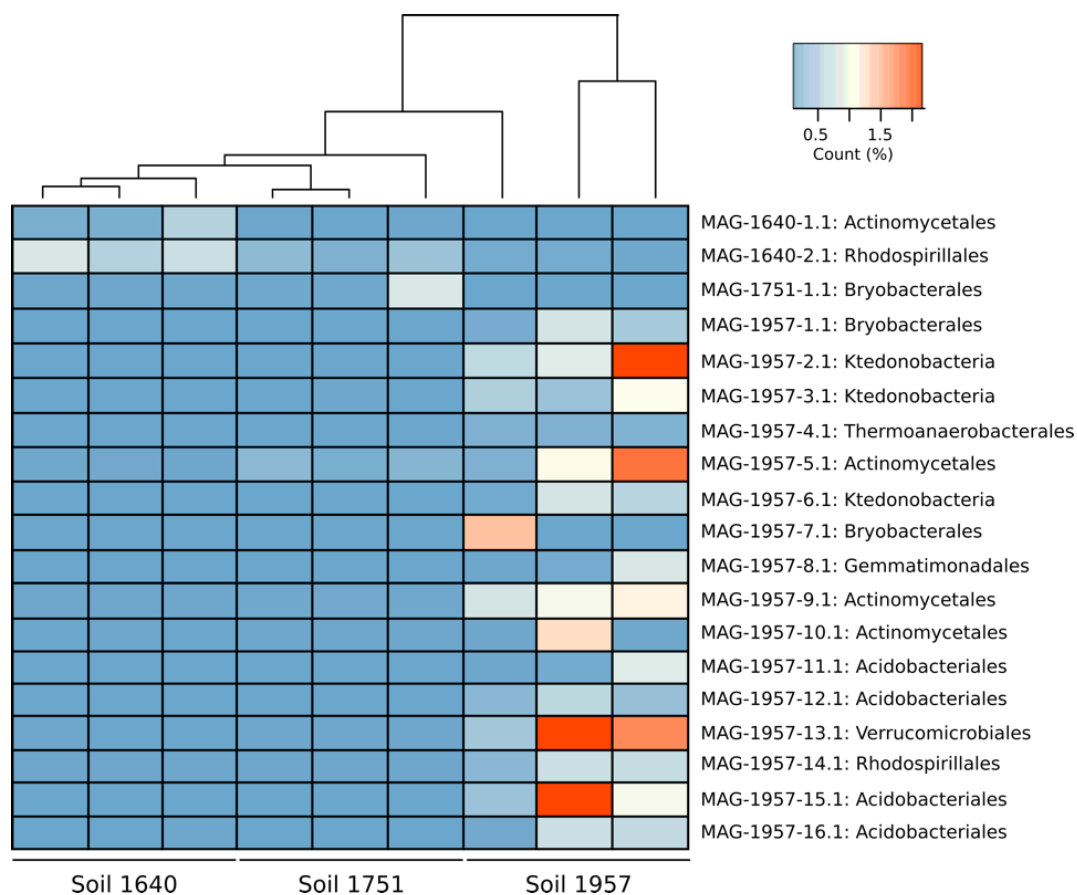

222  
 223

224 Figure 3. Heatmap representing the abundance of MAGs in each metagenome. The analysis was done  
 225 by blast and only hits greater than 95% identity and e-value  $1e-5$  were used.  
 226

### 227 3.3. Metabolic characterisation of MAGs

228 Genes encoding enzymes involved in carbohydrate and energy metabolism, such as carbon fixation,  
 229 sulfur metabolism, ATP synthesis and nitrogen metabolism, as well as terpenoid backbone  
 230 biosynthesis were found in all the MAGs (Table 2). Other functions, including xenobiotic  
 231 biodegradation, fatty acid metabolism, nucleotide metabolism, and vitamin metabolism, among  
 232 others, were also found (Table S2).

233 Table 2. Summary table of complete cellular functions and other high-level features in the MAGs  
 234 recovered from sites 1640, 1751 and 1957 retrieved from KEGG analysis. Reference genomes for  
 235 Ktedonobacteria: DSM45816T [50], DSM44963T [51] and NBRC 113551T [52], (K: KEGG orthology;  
 236 M: KEGG Mode). Asterisks indicate the MAGs isolated from the class Ktedonobacteria. "X" indicates  
 237 MAGs containing genes encoding form I of the CoxL.

|                                                                                  | 1640    | 1751    | 1957    |         |           |           |         |         |           |         |         |         |          |         |           | Reference |           |           |           |                       |                       |                         |  |
|----------------------------------------------------------------------------------|---------|---------|---------|---------|-----------|-----------|---------|---------|-----------|---------|---------|---------|----------|---------|-----------|-----------|-----------|-----------|-----------|-----------------------|-----------------------|-------------------------|--|
| Cellular functions                                                               | MAG-1.1 | MAG-2.1 | MAG-1.1 | MAG-1.1 | MAG-2.1 * | MAG-3.1 * | MAG-4.1 | MAG-5.1 | MAG-6.1 * | MAG-7.1 | MAG-8.1 | MAG-9.1 | MAG-10.1 | MAG-1.1 | MAG-1.2.1 | MAG-1.3.1 | MAG-1.4.1 | MAG-1.5.1 | MAG-1.6.1 | DSM45816 <sup>†</sup> | DSM44963 <sup>†</sup> | NBRCT13551 <sup>†</sup> |  |
| <b>Carbon monoxide oxidation</b>                                                 |         |         |         |         |           |           |         |         |           |         |         |         |          |         |           |           |           |           |           |                       |                       |                         |  |
| K03518 Carbon monoxide dehydrogenase small subunit <i>coxS</i>                   |         |         |         |         |           |           |         |         |           |         |         |         |          |         |           |           |           |           |           |                       |                       |                         |  |
| K03519 Carbon monoxide dehydrogenase medium subunit <i>coxM</i>                  |         |         |         |         |           |           |         |         |           |         |         |         |          |         |           |           |           |           |           |                       |                       |                         |  |
| K03520 Carbon monoxide dehydrogenase large subunit <i>coxL</i> (Form-II)         |         |         |         |         |           |           |         |         |           |         |         |         |          |         |           |           |           |           |           |                       |                       |                         |  |
| K03520 Carbon monoxide dehydrogenase large subunit <i>coxL</i> (Form-I)          | X       | X       | X       |         |           |           |         |         |           |         |         |         |          |         |           |           |           |           |           |                       |                       |                         |  |
| <b>Formate oxidation</b>                                                         |         |         |         |         |           |           |         |         |           |         |         |         |          |         |           |           |           |           |           |                       |                       |                         |  |
| K00122 Formate dehydrogenase                                                     |         |         |         |         |           |           |         |         |           |         |         |         |          |         |           |           |           |           |           |                       |                       |                         |  |
| K00123 Formate dehydrogenase major subunit                                       |         |         |         |         |           |           |         |         |           |         |         |         |          |         |           |           |           |           |           |                       |                       |                         |  |
| <b>Hydrogen oxidation: H<sub>2</sub> dehydrogenase</b>                           |         |         |         |         |           |           |         |         |           |         |         |         |          |         |           |           |           |           |           |                       |                       |                         |  |
| K00436: NAD-reducing hydrogenase large subunit                                   |         |         |         |         |           |           |         |         |           |         |         |         |          |         |           |           |           |           |           |                       |                       |                         |  |
| <b>Central carbohydrate metabolism</b>                                           |         |         |         |         |           |           |         |         |           |         |         |         |          |         |           |           |           |           |           |                       |                       |                         |  |
| M00001 Glycolysis (Embden-Meyerhof pathway), glucose => pyruvate                 |         |         |         |         |           |           |         |         |           |         |         |         |          |         |           |           |           |           |           |                       |                       |                         |  |
| M00002 Glycolysis, core module involving three-carbon compounds                  |         |         |         |         |           |           |         |         |           |         |         |         |          |         |           |           |           |           |           |                       |                       |                         |  |
| M00003 Gluconeogenesis, oxaloacetate => fructose-6P                              |         |         |         |         |           |           |         |         |           |         |         |         |          |         |           |           |           |           |           |                       |                       |                         |  |
| M00004 Pentose phosphate pathway (Pentose phosphate cycle)                       |         |         |         |         |           |           |         |         |           |         |         |         |          |         |           |           |           |           |           |                       |                       |                         |  |
| M00005 PRPP biosynthesis, ribose 5P => PRPP                                      |         |         |         |         |           |           |         |         |           |         |         |         |          |         |           |           |           |           |           |                       |                       |                         |  |
| M00006 Pentose phosphate pathway, oxidative phase, glucose 6P => ribulose 5P     |         |         |         |         |           |           |         |         |           |         |         |         |          |         |           |           |           |           |           |                       |                       |                         |  |
| M00007 Pentose phosphate pathway, non-oxidative phase, fructose 6P => ribose 5P  |         |         |         |         |           |           |         |         |           |         |         |         |          |         |           |           |           |           |           |                       |                       |                         |  |
| M00009 Citrate cycle (TCA cycle, Krebs cycle)                                    |         |         |         |         |           |           |         |         |           |         |         |         |          |         |           |           |           |           |           |                       |                       |                         |  |
| M00010 Citrate cycle, first carbon oxidation, oxaloacetate => 2-oxoglutarate     |         |         |         |         |           |           |         |         |           |         |         |         |          |         |           |           |           |           |           |                       |                       |                         |  |
| M00011 Citrate cycle, second carbon oxidation, 2-oxoglutarate => oxaloacetate    |         |         |         |         |           |           |         |         |           |         |         |         |          |         |           |           |           |           |           |                       |                       |                         |  |
| M00307 Pyruvate oxidation, pyruvate => acetyl-CoA                                |         |         |         |         |           |           |         |         |           |         |         |         |          |         |           |           |           |           |           |                       |                       |                         |  |
| M00580 Pentose phosphate pathway, archaea, fructose 6P => ribose 5P              |         |         |         |         |           |           |         |         |           |         |         |         |          |         |           |           |           |           |           |                       |                       |                         |  |
| <b>Other carbohydrate metabolism</b>                                             |         |         |         |         |           |           |         |         |           |         |         |         |          |         |           |           |           |           |           |                       |                       |                         |  |
| M00012 Glyoxylate cycle                                                          |         |         |         |         |           |           |         |         |           |         |         |         |          |         |           |           |           |           |           |                       |                       |                         |  |
| M00061 D-Gluconate deg., D-gluconate => pyruvate + D-glyceraldehyde 3P           |         |         |         |         |           |           |         |         |           |         |         |         |          |         |           |           |           |           |           |                       |                       |                         |  |
| M00081 Pectin degradation                                                        |         |         |         |         |           |           |         |         |           |         |         |         |          |         |           |           |           |           |           |                       |                       |                         |  |
| M00549 Nucleotide sugar biosynthesis, glucose => UDP-glucose                     |         |         |         |         |           |           |         |         |           |         |         |         |          |         |           |           |           |           |           |                       |                       |                         |  |
| M00552 D-galactonate deg., D, L-Doudoroff pathway, D-galactonate => glycerate-3P |         |         |         |         |           |           |         |         |           |         |         |         |          |         |           |           |           |           |           |                       |                       |                         |  |
| M00554 Nucleotide sugar biosynthesis, galactose => UDP-galactose                 |         |         |         |         |           |           |         |         |           |         |         |         |          |         |           |           |           |           |           |                       |                       |                         |  |
| M00631 D-Galacturonate deg., D-galacturonate => pyruvate + D-glyceraldehyde 3P   |         |         |         |         |           |           |         |         |           |         |         |         |          |         |           |           |           |           |           |                       |                       |                         |  |
| M00632 Galactose degr., Leloir pathway, galactose => alpha-D-glucose-1P          |         |         |         |         |           |           |         |         |           |         |         |         |          |         |           |           |           |           |           |                       |                       |                         |  |
| M00741 Propanoyl-CoA metabolism, propanoyl-CoA => succinyl-CoA                   |         |         |         |         |           |           |         |         |           |         |         |         |          |         |           |           |           |           |           |                       |                       |                         |  |
| M00761 Undecaprenylphosphate & L-Ara4N biosynthesis                              |         |         |         |         |           |           |         |         |           |         |         |         |          |         |           |           |           |           |           |                       |                       |                         |  |
| M00854 Glycogen biosynthesis, glucose-1P => glycogen/starch                      |         |         |         |         |           |           |         |         |           |         |         |         |          |         |           |           |           |           |           |                       |                       |                         |  |
| M00855 Glycogen degradation, glycogen => glucose-6P                              |         |         |         |         |           |           |         |         |           |         |         |         |          |         |           |           |           |           |           |                       |                       |                         |  |
| M00909 UDP-N-acetyl-D-glucosamine, prokaryotes, glucose => UDP-GlcNAc            |         |         |         |         |           |           |         |         |           |         |         |         |          |         |           |           |           |           |           |                       |                       |                         |  |
| <b>Carbon fixation</b>                                                           |         |         |         |         |           |           |         |         |           |         |         |         |          |         |           |           |           |           |           |                       |                       |                         |  |
| M00166 Reductive pentose phosphate cycle, ribulose-5P => glyceraldehyde-3P       |         |         |         |         |           |           |         |         |           |         |         |         |          |         |           |           |           |           |           |                       |                       |                         |  |
| M00168 CAM (Crassulacean acid metabolism), dark                                  |         |         |         |         |           |           |         |         |           |         |         |         |          |         |           |           |           |           |           |                       |                       |                         |  |
| M00169 CAM (Crassulacean acid metabolism), light                                 |         |         |         |         |           |           |         |         |           |         |         |         |          |         |           |           |           |           |           |                       |                       |                         |  |
| M00172 C4-dicarboxylic acid cycle, NADP - malic enzyme type                      |         |         |         |         |           |           |         |         |           |         |         |         |          |         |           |           |           |           |           |                       |                       |                         |  |
| M00579 Phosphate acetyltransferase-acetate kinase pathway, acetyl-CoA => acetate |         |         |         |         |           |           |         |         |           |         |         |         |          |         |           |           |           |           |           |                       |                       |                         |  |
| <b>ATP synthesis</b>                                                             |         |         |         |         |           |           |         |         |           |         |         |         |          |         |           |           |           |           |           |                       |                       |                         |  |
| M00144 NADH:quinone oxidoreductase, prokaryotes                                  |         |         |         |         |           |           |         |         |           |         |         |         |          |         |           |           |           |           |           |                       |                       |                         |  |
| M00149 Succinate dehydrogenase, prokaryotes                                      |         |         |         |         |           |           |         |         |           |         |         |         |          |         |           |           |           |           |           |                       |                       |                         |  |
| M00151 Cytochrome bc1 complex respiratory unit                                   |         |         |         |         |           |           |         |         |           |         |         |         |          |         |           |           |           |           |           |                       |                       |                         |  |
| M00155 Cytochrome c oxidase, prokaryotes                                         |         |         |         |         |           |           |         |         |           |         |         |         |          |         |           |           |           |           |           |                       |                       |                         |  |
| M00156 Cytochrome c oxidase, ebb3-type                                           |         |         |         |         |           |           |         |         |           |         |         |         |          |         |           |           |           |           |           |                       |                       |                         |  |
| M00157 F-type ATPase, prokaryotes and chloroplasts                               |         |         |         |         |           |           |         |         |           |         |         |         |          |         |           |           |           |           |           |                       |                       |                         |  |
| <b>Terpenoid backbone biosynthesis</b>                                           |         |         |         |         |           |           |         |         |           |         |         |         |          |         |           |           |           |           |           |                       |                       |                         |  |
| M00096 C5 isoprenoid biosynthesis, non-mevalonate pathway                        |         |         |         |         |           |           |         |         |           |         |         |         |          |         |           |           |           |           |           |                       |                       |                         |  |
| M00364 C10-C20 isoprenoid biosynthesis, bacteria                                 |         |         |         |         |           |           |         |         |           |         |         |         |          |         |           |           |           |           |           |                       |                       |                         |  |
| M00365 C10-C20 isoprenoid biosynthesis, archaea                                  |         |         |         |         |           |           |         |         |           |         |         |         |          |         |           |           |           |           |           |                       |                       |                         |  |

238  
239  
240  
241  
242  
243  
244  
245  
246  
247  
248  
249  
250  
251  
252  
253  
254  
255  
256  
257  
258

### 3.3.1 Characterization of CODH and hydrogenase genes in MAGs

Three MAGs (MAG-1640-1.1, MAG-1751-1.1 and MAG-1957-2.1) encoded form I of the CO-dehydrogenase large subunit (*coxL*). These MAGs were each associated with a particular soil, with low abundance in the metagenomes of the other sites (Figure 4A). In addition to these three form-I *coxL* encoding MAGs, 15 other scaffolds from MAGs containing form II *coxL*-like genes were recovered (data not shown), but the function of form II *CoxL* is not yet known. The arrangement of genes encoding form I CODH in each of the MAGs is shown in Figure 4B. It should be noted that all of these three MAGs show the canonical arrangement for the three structural genes of CODH, that is the MSL genes. The genes encoding the [NiFe]-hydrogenase and its accessory proteins were only identified in MAG-1957-2.1, and instead only some of the accessory *hyp* genes were found in the other two MAGs (Figure 4B). A phylogenetic analysis of the form I *coxL* genes was performed, showing they are affiliated with Actinobacteria (MAG-1640-1.1), Nitrospirae *Candidatus* Manganitrophus noduliformans (MAG-1751-1.1) and Chloroflexi (MAG-1957-2.1) (Figure 5). This grouping is consistent with the results of PhyloSift (Figure 2), except for MAG-1751-1.1 where it was loosely associated with Acidobacteria (although with an amino-acid identity of only 40%) rather than Nitrospirae.



259

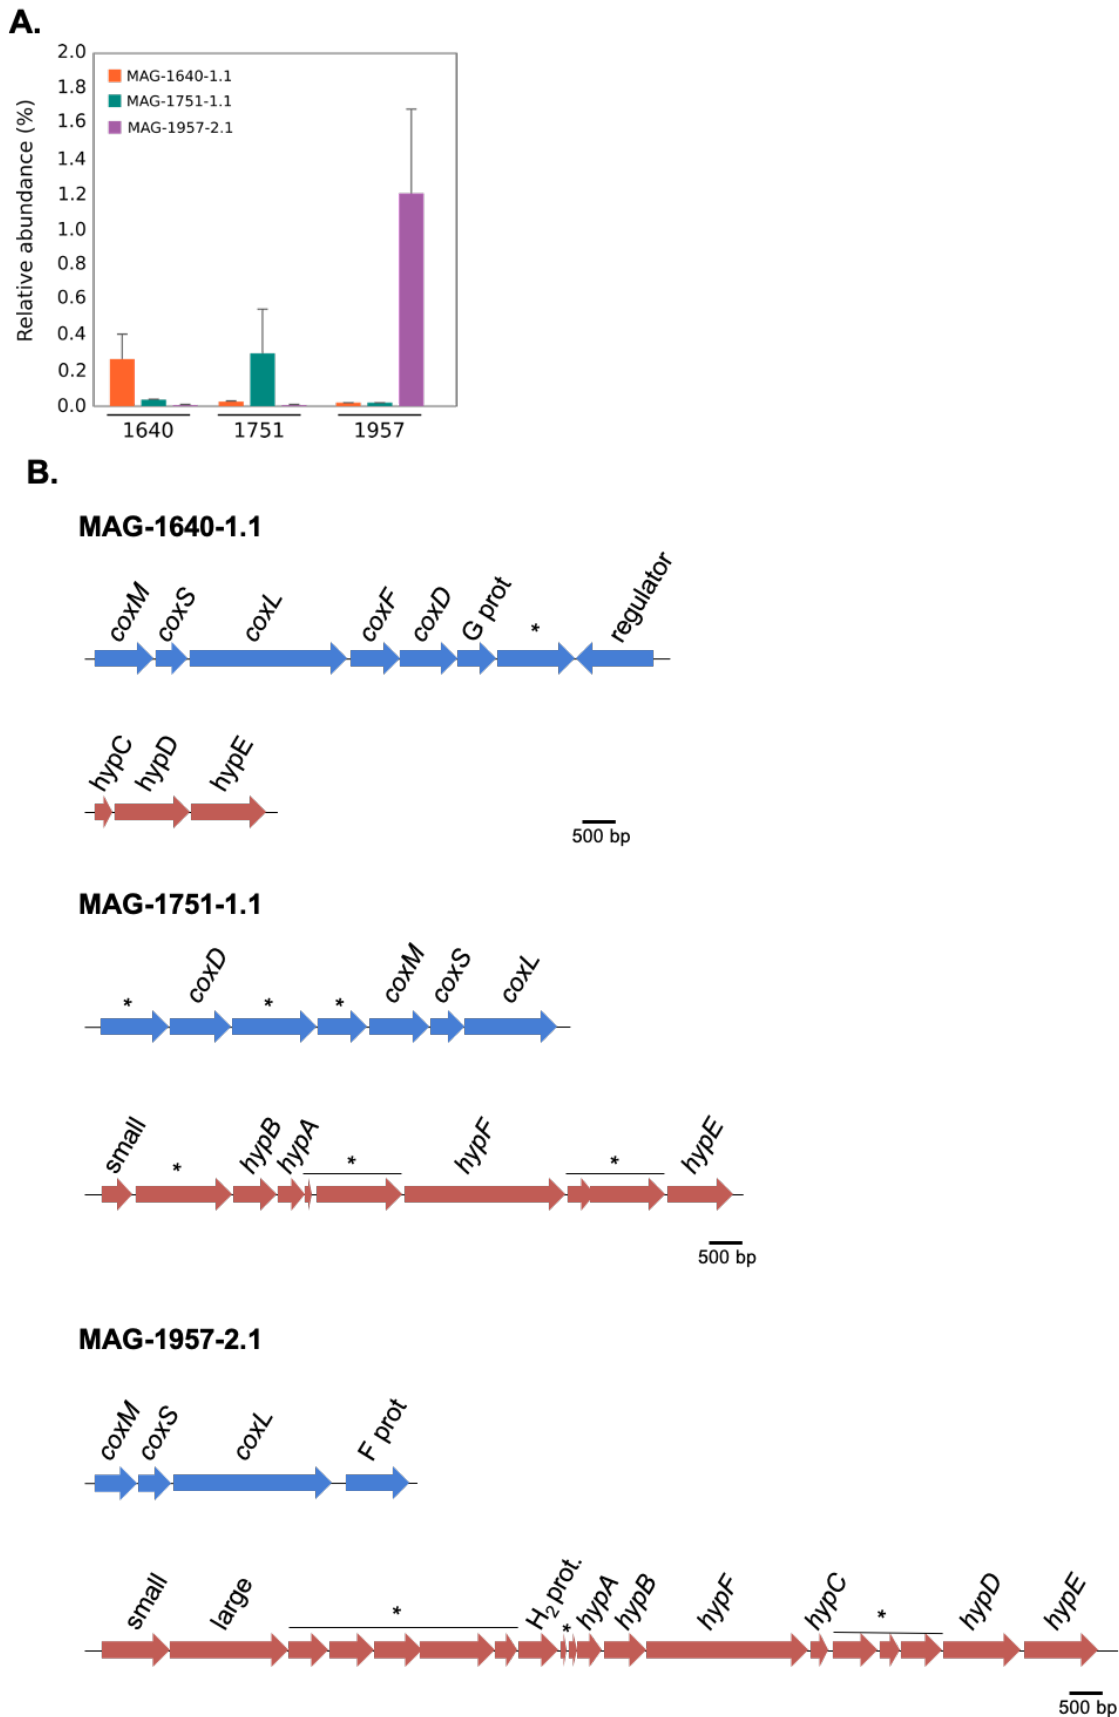

260  
261  
262  
263

Figure 4. A. Relative abundance of MAG-1640-1.1, MAG-1751-1.1 and MAG-1957-2.1 in sites 1640, 1751, 1957. Bars indicate standard error of triplicates. B. Gene arrangement of the carbon monoxide dehydrogenase (CODH) and membrane-bound [NiFe]-hydrogenase in MAG-1640-1.1, MAG-1751-

264 1.1 and MAG-1957-2.1 (\* indicates hypothetical proteins; small indicates NiFe-hydrogenase small  
265 subunit and large indicates NiFe-hydrogenase large subunit).  
266

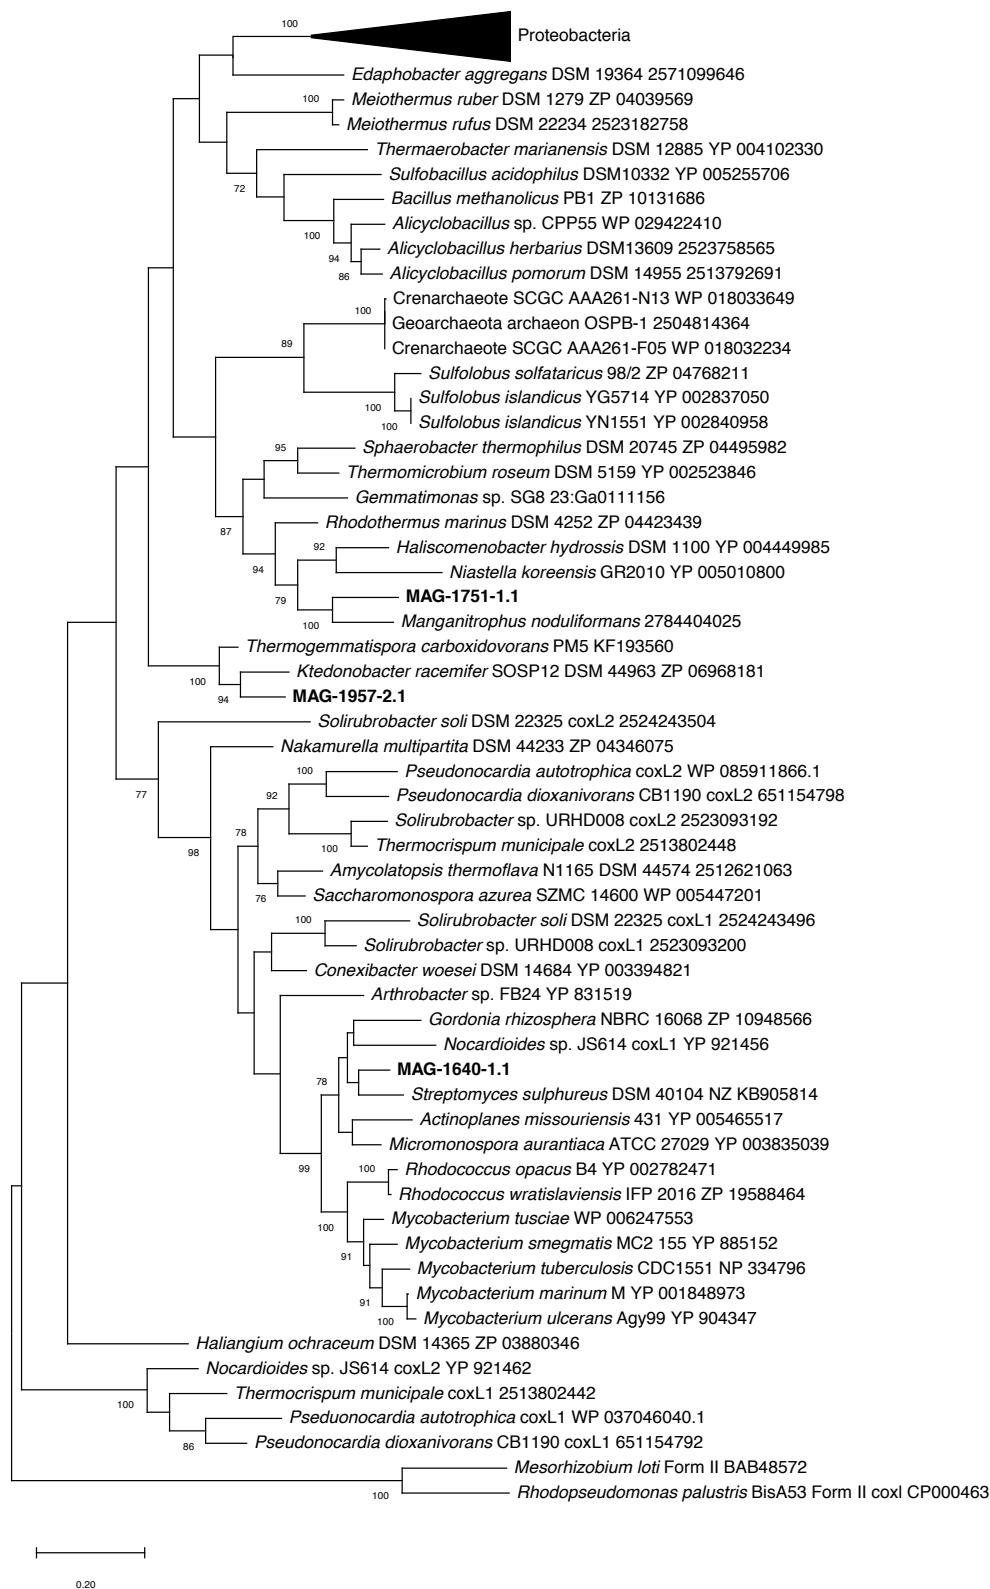

267  
268 Figure 5. Phylogenetic tree of form I carbon monoxide dehydrogenase large subunit (CoxL) of  
269 metagenome-assembled genomes retrieved from Llaima volcano (MAG-1640-2.1, MAG-1751-1.1 and  
270 MAG-1957-2.1) against a reference sequences (with accession numbers included in the tree). The tree

271 was drawn using the Maximum Likelihood method using MEGA X [48]. Bootstrap values (500  
272 replications) are shown at the nodes. MAG-1751\_1.1 is a partial sequence of the *coxL* gene.

273

### 274 3.3.2 Complete metabolic characterization of Ktedonobacterales MAGs

275 Here we focused on the Ktedonobacterales MAGs because of their apparent importance in early soil  
276 formation. Three Ktedonobacterales MAGs were identified in the 1957 soil metagenomes, but were  
277 not found in the older soils (Figure 2 and 3). Two of the MAGs (MAGs 1957-2.1 and 1957-3.1),  
278 related/affiliated to the class Ktedonobacteria (phylum Chloroflexi), contained genes for the complete  
279 electron transport chain, citric acid metabolism, nitrogen metabolism, sulfur metabolism, several  
280 transporters, the complete gene set for carbon monoxide oxidation (CO dehydrogenase), herbicide  
281 degradation and degradation aromatics as well as the major subunit of the formate dehydrogenase,  
282 and also a hydrogenase. MAG 1957-6.1 (Ktedonobacteria) had very similar pathways as the other  
283 Chloroflexi MAGs, except a step for CO-oxidation and the electron transport chain were absent (Table  
284 2, Table S2, Figure 6).

285

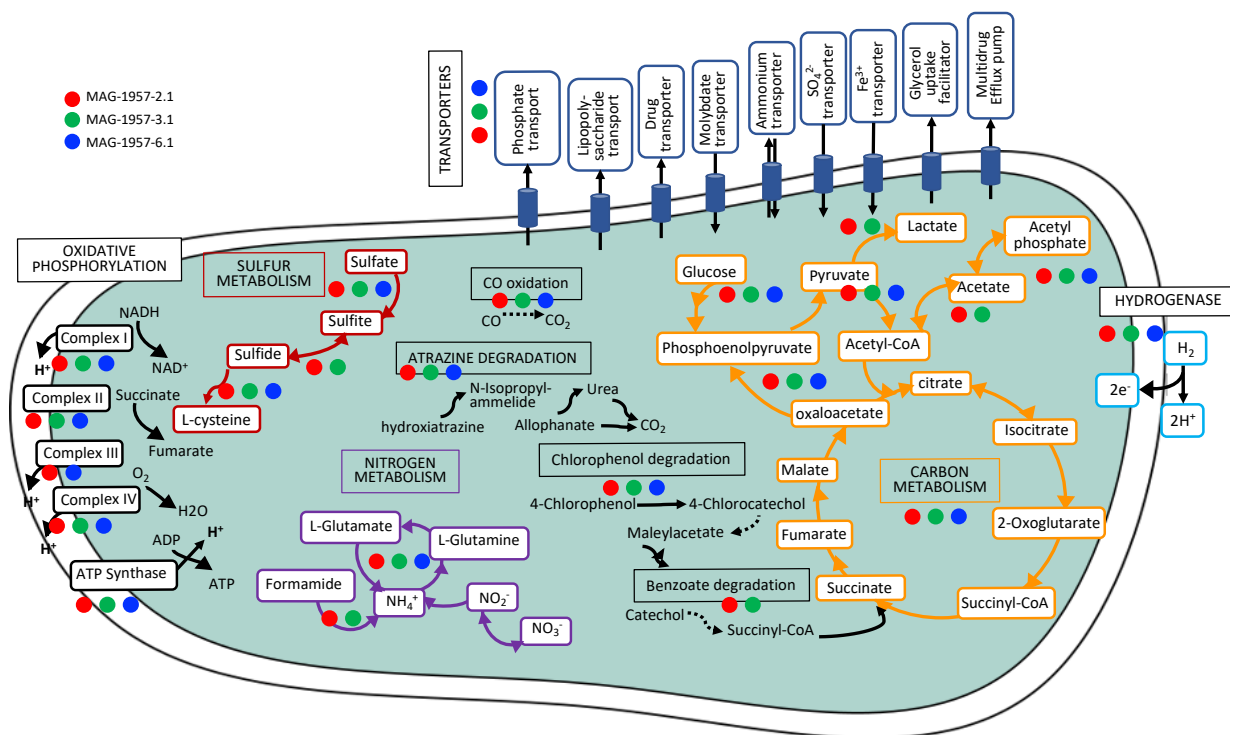

286

287 Figure 6. Metabolic reconstruction for some of the most important functions in the  
288 Ktedonobacteria MAGs isolated from the youngest soil using KEGG (More information in Table 2  
289 and Table S2), dashed lines were used for incomplete pathways. Multi-arrows lines indicate several  
290 steps of a pathway.

291

## 292 4. Discussion

### 293 4.1. Characterisation of MAGs

294 In this study, a characterisation of metagenome-assembled genomes retrieved from Llaima volcano  
295 was performed. This study builds from a previous study [19] in which 16S rRNA gene amplicon-  
296 based sequences from those soils were analysed. The main objective of this study was to characterise  
297 genomes from those sites and to analyse the functions of the abundant but the poorly characterised  
298 Ktedonobacteria (phylum Chloroflexi) present at Llaima volcano. The relative abundance of the main  
299 phyla based on classification of scaffolds larger than 500 bp showed that microbial communities

300 change as the soils age (Figure S1). This corroborates findings from a previous study [19]. For  
301 example, the relative abundance of Chloroflexi is higher in the younger soils (28% in the youngest  
302 soil to 7% in the oldest soil) and the opposite trend is observed for members of the phylum  
303 Proteobacteria, as their abundance increases as the soil ages (from 42% in the youngest soil to 59% in  
304 the oldest soil) (Figure S1). Except for those related to Firmicutes and Verrucomicrobia, and to a lesser  
305 extent Acidobacteria and Proteobacteria, the extracted environmental genomes had an amino acid  
306 identity > 50% with their closest reference genome (Table S3), which suggest that they belonged to  
307 those genera [53].

308 A total of 16 MAGs were recovered from the youngest soil (1957) (Figure 3). This soil is only  
309 partially vegetated (about 5%) by mosses and lichens. The microbial community in this area likely  
310 harbours populations able to grow as facultative chemolithoautotrophs or mixotrophs on carbon  
311 monoxide, hydrogen or methane. This high relative abundance of MAGs with genes for CO and  
312 hydrogen utilization in the youngest soils is consistent with reports by King and colleagues for  
313 Hawaiian and Japanese volcanic deposits (21- to 800-year old sites). For some of those sites, microbial  
314 community structure changed as the soil matured with members of the phylum Proteobacteria  
315 dominating vegetated sites while younger sites were enriched with Ktedonobacteria within the  
316 Chloroflexi and characterized by relatively high rates of atmospheric CO uptake [7,14,54].

317 MAGs were most abundant in the soil site from where they were retrieved (Figure 3). Relatively  
318 few MAGs were retrieved from the two older soils, which can be explained by the higher diversity  
319 in these soils and the decreased likelihood of recovering MAGs from groups such as Actinobacteria,  
320 Acidobacteria and Chloroflexi that were less common in them. In fact, several of the MAGs retrieved  
321 had a low relative abundance within the soils (Figure 3), which is consistent with their relative  
322 abundance of 16S rRNA genes in these soils [19]. Binning at the strain level remains a technical  
323 challenge [55], with the chances of retrieving MAGs at a given sequencing effort being reduced with  
324 increasing microdiversity (intra-population genetic diversity) and overall community diversity [56].  
325 We previously reported that as the soil recovered and vegetation established, the microbial  
326 population appeared to enlarge and become more diverse [19], which explains the lower number of  
327 MAGS retrieved from more mature soil (1640 sample), compared to the younger sites (1957).

#### 328 4.2. Metabolic characterisation of MAGs

329 The three MAGs containing form I *coxL* genes were found in an operon structure (Fig. 4B) typical  
330 of known CO oxidizers [41]. Form I *coxL* has been definitively associated with CO oxidation at high  
331 concentrations and also at sub-atmospheric levels [41]. Thus, even at low abundance, the presence of  
332 these *cox*-containing MAGs strongly suggests a capacity for atmospheric CO uptake at all the sites.

333 Most of the complete functions found from the Ktedonobacteria MAGs were also found in three  
334 reference genomes: *Ktedonobacter racemifer* DSM 44963 [51], *Thermogemmatispora carboxidivorans* PM5,  
335 isolated from a geothermal biofilm on Kilauea Volcano, Hawaii (USA) [50] and *Dictyobacter vulcani*  
336 W12 [52]. According to our genomic analyses, all of these reference strains possess formate-, H<sub>2</sub>-, and  
337 CO-dehydrogenases as do the MAGs recovered in the present study. *Burkholderia* strains (phylum  
338 Proteobacteria) [57], members of the phylum Chloroflexi [14] and other members of the phyla  
339 Proteobacteria and Actinobacteria [58] have also been reported as CO-oxidisers in Hawaiian volcanic  
340 deposits. *coxL* genes encoding the large subunit of the CO dehydrogenase have been found in  
341 Proteobacteria species from Kilauea and Miyake-jima volcanoes [10,14,54].

342 The taxonomies of MAGs 1640-1.1 and 1957-2.1 were consistent for *coxL* (Figure 5) and  
343 phylogenomic analyses (Figure 2). In contrast, MAG-1751-1.1 clustered weakly with Acidobacteria  
344 based on genomic analysis (40% amino acid identity with a reference genome, see Table S3) but did  
345 not cluster with *Candidatus Manganitrophus noduliformans* as did the *coxL* sequence from this MAG.

346 Several strains from the class Ktedonobacteria have been isolated from different environments  
347 (Table S4), but only *Dictyobacter vulcani* W12 [52] and *Thermogemmatispora carboxidivorans* PM5 [50]  
348 have been isolated from volcanic environments. So far, the class Ktedonobacteria contains only six

349 genera and fifteen formally proposed species. Out of the 15 type strains, 11 genomes are available on  
350 RefSeq (Table S2). The order Ktedonobacterales contains the type strains *Ktedonobacter racemifer*  
351 SOSP1-21<sup>T</sup> [51,59], *Dictyobacter aurantiacus* S-27<sup>T</sup> [60], *Dictyobacter vulcani* W12<sup>T</sup> [52], *Thermosporothrix*  
352 *hazakensis* SK20-1<sup>T</sup> [61], *Thermosporothrix narukonensis* F4<sup>T</sup> [62], *Ktedonosporobacter rubrisoli* SCAWS-  
353 G2<sup>T</sup> [63], *Tengunoibacter tsumagoiensis* Uno3<sup>T</sup>, *Dictyobacter kobayashii* Uno11<sup>T</sup> and *Dictyobacter alpinus*  
354 Uno16<sup>T</sup> [64]. The order *Thermogemmatispora* contains the species *Thermogemmatispora aurantia* A1-2<sup>T</sup>  
355 [65], *Thermogemmatispora argillosa* A3-2<sup>T</sup> [65], *Thermogemmatispora onikobensis* NBRC 111776  
356 (unpublished, RefSeq Nr NZ\_BDGT00000000.1), *Thermogemmatispora onikobensis* ONI-1<sup>T</sup> [66],  
357 *Thermogemmatispora foliorum* ONI-5<sup>T</sup> [66] and *Thermogemmatispora carboxidivorans* PM5<sup>T</sup> [50]. All of  
358 those genomes contain the complete gene set for carbon monoxide oxidation (CO dehydrogenase),  
359 as well as formate dehydrogenases, and a H<sub>2</sub> dehydrogenases (Table S4). Our study particularly  
360 brings more insights into the role that early colonisers of this group from volcanic soils may have in  
361 the development of soils.

362 The large subunit of the NAD-reducing hydrogenase was also found in several MAGs (Table 2).  
363 Hydrogen metabolism has been shown to provide an additional energy source for some  
364 microorganisms and has been observed in bacteria and archaea [67]. Hydrogen dehydrogenases have  
365 also been found in members of the genus *Cupriavidus* (phylum Proteobacteria) from volcanic  
366 mudflow deposits in the Philippines suggesting their potential contribution to hydrogen uptake [68].  
367

#### 368 4. Conclusions

369 This study is further evidence that poorly characterised groups such as Ktedonobacteria,  
370 establish in remote volcanic sites and may use reduced gases for growth. Further studies are needed  
371 to demonstrate the activity of these pathways and their significance in volcanic deposits.  
372

373 **Author Contributions:** Conceptualization, M.H., R.C. and C.C.T.; sampling campaign, M.C.-F.; methodology,  
374 M.H. and B.V.-G.; software, M.H.; validation, M.H., B.V.-G., G.M.K., R.C. and C.C.T.; formal analysis, M.H.;  
375 investigation, M.H.; resources, M.H., R.C. and C.C.T.; data curation, M.H.; writing—original draft preparation,  
376 M.H.; writing—review and editing, M.H., B.V.-G., G.M.K., R.C. and C.C.T.; visualization, M.H.; supervision, R.C.  
377 and C.C.T.; project administration, M.H.; funding acquisition, M.H. All authors have read and agreed to the  
378 published version of the manuscript.

379 **Funding:** This research was funded by the Alexander von Humboldt Foundation, Germany.

380 **Acknowledgments:** We thank Mr. Stefan Mecke from the Thünen Institut für Biodiversität, Germany, for  
381 technical support. Part of the research presented in this paper was carried out on the High-Performance  
382 Computing Cluster supported by the Research and Specialist Computing Support Service (RSCSS) at the  
383 University of East Anglia; a special thanks to Mr. Mike Adams in RSCSS for technical support.

384

#### 385 References

- 386 1. Wubs, E.R.; van der Putten, W.H.; Bosch, M.; Bezemer, T.M. Soil inoculation steers  
387 restoration of terrestrial ecosystems. *Nat. Plants* **2016**, *2*, 16107.
- 388 2. Kelly, L.C.; Cockell, C.S.; Thorsteinsson, T.; Marteinsson, V.; Stevenson, J. Pioneer microbial  
389 communities of the Fimmvörðuháls Lava Flow, Eyjafjallajökull, Iceland. *Microbial Ecol.*  
390 **2014**, *68*, 504-518.
- 391 3. Witt, V.; Ayris, P.M.; Damby, D.E.; Cimarelli, C.; Kueppers, U.; Dingwell, D.B.; et al.  
392 Volcanic ash supports a diverse bacterial community in a marine mesocosm. *Geobiology*  
393 **2017**, *15*, 453-463.

- 394 4. Smith, H.G. The colonization of volcanic tephra on deception island by protozoa. *Br.*  
395 *Antarct. Surv. Bull.* **1974**, *38*, 49-58.
- 396 5. Chadwick, O.A.; Derry, L.; Vitousek, P.M.; Huebert, B.J.; Hedin, L.O. Changing sources of  
397 nutrients during fourmillion years of ecosystem development. *Nature* **1999**, *397*, 491-497.
- 398 6. Fujimura, R.; Sato, Y.; Nishizawa, T.; Nanba, K.; Oshima, K.; Hattori, M.; et al. Analysis of  
399 early bacterial communities on volcanic deposits on the island of Miyake (Miyake-jima),  
400 Japan: a 6-year study at a fixed site. *Microbes Environ.* **2012**, *27*, 19-29.
- 401 7. King, G.M. Contributions of atmospheric CO and hydrogen uptake to microbial dynamics  
402 on recent Hawaiian volcanic deposits. *Appl. Environ. Microbiol.* **2003**, *69*: 4067-4075.
- 403 8. Ohta, H.; Ogiwara, K.; Murakami, E.; Takahashi, H.; Sekiguchi, M.; Koshida, K.; et al.  
404 Quinone profiling of bacterial populations developed in the surface layer of volcanic  
405 mudflow deposits from Mt. Pinatubo (the Philippines). *Soil Biol. Biochem.* **2003**, *35*, 1155-  
406 1158.
- 407 9. Sato, Y.; Nishihara, H.; Yoshida, M.; Watanabe, M.; Rondal, J.D.; Ohta, H. Occurrence of  
408 hydrogen-oxidizing *Ralstonia* species as primary microorganisms in the Mt. Pinatubo  
409 volcanic mudflow deposits. *Soil Sci. Plant Nutr.* **2004**, *50*, 855-861.
- 410 10. Gomez-Alvarez, V.; King, G.M.; Nüsslein, K. Comparative bacterial diversity in recent  
411 Hawaiian volcanic deposits of different ages. *FEMS Microbiol. Ecol.* **2007**, *60*, 60-73.
- 412 11. Guo, Y.; Fujimura, R.; Sato, Y.; Suda, W.; Kim, S.W.; Oshima, K.; et al. Characterization of  
413 early microbial communities on volcanic deposits along a vegetation gradient on the island  
414 of Miyake, Japan. *Microbes Environ.* **2014**, *29*, 38-49.
- 415 12. Kim, J.S.; Kim, D.S.; Lee, K.C.; Lee, J.S.; King, G.M.; Kang, S. Microbial community structure  
416 and functional potential of lava-formed Gotjawal soils in Jeju, Korea. *PLoS One.* **2018**, *13*,  
417 e0204761.
- 418 13. King, G.M. Molecular and culture-based analyses of aerobic carbon monoxide oxidizer  
419 diversity. *Appl. Environ. Microbiol.* **2003**, *69*, 7257-7265.
- 420 14. Weber, C.F.; King, G.M. Distribution and diversity of carbon monoxide-oxidizing bacteria  
421 and bulk bacterial communities across a succession gradient on a Hawaiian volcanic  
422 deposit. *Environ. Microbiol.* **2010**, *12*, 1855-1867.
- 423 15. Cordero, P.R.F.; Bayly, K.; Leung, P.M.; Huang, C.; Islam, Z.F.; Schittenhelm, R.B.; King,  
424 G.M.; Greening, C. Atmospheric carbon monoxide oxidation is a widespread mechanism  
425 supporting microbial survival. *ISME J.* **2019**, *13*, 2868-2881.
- 426 16. Patrauchan, M.A.; Miyazawa, D.; LeBlanc, J.C.; Aiga, C.; Florizone, C.; Dosanjh, M.; et al.  
427 Proteomic analysis of survival of *Rhodococcus jostii* RHA1 during carbon starvation. *Appl.*  
428 *Environ. Microbiol.* **2012**, *78*, 6714-6725.
- 429 17. Berney, M.; Cook, G.M. Unique flexibility in energy metabolism allows mycobacteria to  
430 combat starvation and hypoxia. *PLoS One* **2010**, *5*, e8614.
- 431 18. Islam, Z.F.; Cordero, P.R.F.; Feng, J.; Chen, Y.J.; Bay, S.K.; Jirapanjawan, T.; et al. Two  
432 Chloroflexi classes independently evolved the ability to persist on atmospheric hydrogen  
433 and carbon monoxide. *ISME J.* **2019**, *13*, 1801-1813.

- 434 19. Hernández, M.; Calabi, M.; Conrad, R.; Dumont, M.G. Analysis of the microbial  
435 communities in soils of different ages following volcanic eruptions. *Pedosphere* **2020**, *30*, 126-  
436 134.
- 437 20. Hernández, M.; Dumont, M.G.; Calabi, M.; Basualto, D.; Conrad, R. Ammonia oxidizers are  
438 pioneer microorganisms in the colonization of new acidic volcanic soils from South of  
439 Chile. *Environ. Microbiol. Rep.* **2014**, *6*, 70-79.
- 440 21. Andrews, S. FastQC: A quality control tool for high throughput sequence data 2010.  
441 Available online: <https://www.bioinformatics.babraham.ac.uk/projects/fastqc/>
- 442 22. Bushnell, B.; Rood, J.; Singer, E. BBMerge - accurate paired shotgun read merging via  
443 overlap. *PloS One* **2017**, *12*, 1e15.
- 444 23. Li, D.; Liu, C.M.; Luo, R.; Sadakane, K.; Lam, T.W. MEGAHIT: An ultra-fast single-node  
445 solution for large and complex metagenomics assembly via succinct de Bruijn graph.  
446 *Bioinformatics* **2015**, *31*, 1674-1676.
- 447 24. Bankevich, A.; Nurk, S.; Antipov, D.; Gurevich, A.A.; Dvorkin, M.; Kulikov, A.S.; et al.  
448 SPAdes: a new genome assembly algorithm and its applications to single-cell sequencing. *J.*  
449 *Comput. Biol.* **2012**, *19*, 455-477.
- 450 25. Nurk, S.; Meleshko, D.; Korobeynikov, A.; Pevzner, P.A. metaSPAdes: A new versatile  
451 metagenomic assembler. *Genome Res.* **2017**, *27*, 824-834.
- 452 26. Mikheenko, A.; Saveliev, V.; Gurevich, A. MetaQUAST: evaluation of metagenome  
453 assemblies. *Bioinformatics* **2016**, *32*, 1088-1090.
- 454 27. Ondov, B.D.; Bergman, N.H.; Phillippy, A.M. Interactive metagenomic visualization in a  
455 Web browser. *BMC Bioinformatics* **2011**, *12*, 385.
- 456 28. Uritskiy, G.V.; DiRuggiero, J.; Taylor, J. MetaWRAP-a flexible pipeline for genome-resolved  
457 metagenomic data analysis. *Microbiome* **2018**, *6*, 158.
- 458 29. Wu, Y.W.; Simmons, B.A.; Singer, S.W. MaxBin 2.0: an automated binning algorithm to  
459 recover genomes from multiple metagenomic datasets. *Bioinformatics* **2016**, *32*, 605-607.
- 460 30. Kang, D.D.; Froula, J.; Egan, R.; Wang, Z. MetaBAT, an efficient tool for accurately  
461 reconstructing single genomes from complex microbial communities. *PeerJ* **2015**, *3*, e1165.
- 462 31. Alneberg, J.; Bjarnason, B.S.; de Bruijn, I.; Schirmer, M.; Quick, J.; Ijaz, U.Z.; et al. Binning  
463 metagenomic contigs by coverage and composition. *Nat. Methods* **2014**, *11*, 1144-1146.
- 464 32. Parks, D.H.; Imelfort, M.; Skennerton, C.T.; Hugenholtz, P.; Tyson, G.W. CheckM: assessing  
465 the quality of microbial genomes recovered from isolates, single cells, and metagenomes.  
466 *Genome Res.* **2015**, *25*, 1043-1055.
- 467 33. Laczny, C.C.; Sternal, T.; Plugaru, V.; Gawron, P.; Atashpendar, A.; Margossian, H.H.; et al.  
468 VizBin - an application for reference-independent visualization and human-augmented  
469 binning of metagenomic data. *Microbiome* **2015**, *3*, 1-7.
- 470 34. Olm, M.R.; Brown, C.T.; Brooks, B.; Banfield, J.F. dRep: a tool for fast and accurate genomic  
471 comparisons that enables improved genome recovery from metagenomes through de-  
472 replication. *ISME J.* **2017**, *11*, 2864-2868.

- 473 35. Zhang, Z.; Schwartz, S.; Wagner, L.; Miller, W. A greedy algorithm for aligning DNA  
474 sequences. *J. Comput. Biol.* **2000**, *7*, 203-214.
- 475 36. Mizuno, C.M.; Rodriguez-Valera, F.; Kimes, N.E.; Ghai, R. Expanding the marine  
476 virosphere using metagenomics. *PLoS Genet.* **2013**, *9*, e1003987.
- 477 37. Warnes, G.R.; Bolker, B.; Bonebakker, L.; Gentleman, R.; Liaw, W.H.A.; Lumley, T.; et al.  
478 Gplots: Various R programming tools for plotting data. The Comprehensive R Archive  
479 Network. **2009**. <https://cran.r-project.org/web/packages/gplots/index.html>
- 480 38. Hyatt, D.; Chen, G.L.; LoCascio, P.F.; Land, M.L.; Larimer, F.W.; Hauser, L.J. Prodigal:  
481 prokaryotic gene recognition and translation initiation site identification. *BMC*  
482 *Bioinformatics* **2010**, *11*, 119.
- 483 39. Bose, T.; Haque, M.M.; Reddy, C.; Mande, S.S. COGNIZER: a framework for functional  
484 annotation of metagenomic datasets. *PLoS One* **2015**, *10*, e0142102.
- 485 40. Kanehisa, M.; Sato, Y. KEGG Mapper for inferring cellular functions from protein  
486 sequences. *Protein Sci.* **2020**, *29*, 28-35.
- 487 41. King, G.M.; Weber, C.F. Distribution, diversity and ecology of aerobic CO-oxidizing  
488 bacteria. *Nat. Rev. Microbiol.* **2007**, *5*, 107-118.
- 489 42. Aziz, R.K.; Bartels, D.; Best, A.A.; DeJongh, M.; Disz, T.; Edwards, R.A.; et al. The RAST  
490 Server: rapid annotations using subsystems technology. *BMC Genomics* **2008**, *9*, 75.
- 491 43. Overbeek, R.; Olson, R.; Pusch, G.D.; Olsen, G.J.; Davis, J.J.; Disz, T.; et al. The SEED and the  
492 Rapid Annotation of microbial genomes using Subsystems Technology (RAST). *Nucleic*  
493 *Acids Res.* **2014**, *42*, D206D214.
- 494 44. Rodriguez-R, L.M.; Konstantinidis, K.T. The enveomics collection: a toolbox for specialized  
495 analyses of microbial genomes and metagenomes. *PeerJ Prepr.* **2016**, *4*, e1900v1.
- 496 45. Price, M.N.; Dehal, P.S.; Arkin, A.P. FastTree 2—Approximately maximum-likelihood trees  
497 for large alignments. *PLoS ONE* **2010**, *5*, e9490.
- 498 46. Darling, A.E.; Jospin, G.; Lowe, E.; Matsen, F.A.; Bik, H.M.; Eisen, J.A. PhyloSift:  
499 phylogenetic analysis of genomes and metagenomes. *PeerJ* **2014**, *2*, e243.
- 500 47. Jones, D.T.; Taylor, W.R.; Thornton, J.M. The rapid generation of mutation data matrices  
501 from protein sequences. *Comp. Appl. Biosci.* **1992**, *8*, 275-282.
- 502 48. Kumar, S.; Stecher, G.; Li, M.; Knyaz, C.; Tamura K. MEGA X: Molecular Evolutionary  
503 Genetics Analysis across computing platforms. *Mol. Biol. Evol.* **2018**, *35*, 1547-1549.
- 504 49. Stecher, G.; Tamura, K.; Kumar, S. Molecular Evolutionary Genetics Analysis (MEGA) for  
505 macOS. *Mol. Biol. Evol.* **2020**, *37*, 1237-1239.
- 506 50. King, C.E.; King, G.M. Description of *Thermogemmatispora carboxidivorans* sp. Nov., a  
507 carbon-monoxide-oxidizing member of the class *Ktedonobacteria* isolated from a  
508 geothermally heated biofilm, and analysis of carbon monoxide oxidation by members of the  
509 class *Ktedonobacteria*. *Int. J. Syst. Evol. Microbiol.* **2014**, *64*, 1244-1251.



- 510 51. Chang, Y.J.; Land, M.; Hauser, L.; Chertkov, O.; Del Rio T.G.; Nolan, M.; et al. Non-  
511 contiguous finished genome sequence and contextual data of the filamentous soil  
512 bacterium *Ktedonobacter racemifer* type strain (SOSP1-21). *Stand. Genomic. Sci.* **2011**, *5*, 97-111.
- 513 52. Zheng, Y.; Wang, C.M.; Sakai, Y.; Abe, K.; Yokota, A.; Yabe, S. *Dictyobacter vulcani* sp. nov.,  
514 belonging to the class Ktedonobacteria, isolated from soil of the Mt Zao volcano. *Int. J. Syst.*  
515 *Evol. Microbiol.* **2020**, *70*, 1805-1813.
- 516 53. Qin, Q.L.; Xie, B.B.; Zhang, X.Y.; Chen, X.L.; Zhou, B.C.; Zhou, J.; et al. A proposed genus  
517 boundary for the prokaryotes based on genomic insights. *J. Bacteriol.* **2014**, *196*, 2210-2215.
- 518 54. King, G.M.; Weber, C.F.; Nanba, K.; Sato, Y.; Ohta, H. Atmospheric CO and hydrogen  
519 uptake and CO oxidizer phylogeny for Miyake-jima, Japan volcanic deposits. *Microbes*  
520 *Environ.* **2008**, *23*, 299-305.
- 521 55. Martinez-Hernandez, F.; Fornas, O.; Lluesma Gomez, M.; Bolduc, B.; de la Cruz Peña, M.J.;  
522 Martínez, J.M.; et al. Single-virus genomics reveals hidden cosmopolitan and abundant  
523 viruses. *Nat. Commun.* **2017**, *8*, 15892.
- 524 56. Ramos-Barbero, M.D.; Martin-Cuadrado, A.B.; Viver, T.; Santos, F.; Martinez-Garcia, M.;  
525 Anton, J. Recovering microbial genomes from metagenomes in hypersaline environments:  
526 the good, the bad and the ugly. *Syst. Appl. Microbiol.* **2019**, *42*, 30-40.
- 527 57. Weber, C.F.; King, G.M. Quantification of *Burkholderia coxL* genes in Hawaiian volcanic  
528 deposits. *Appl. Environ. Microbiol.* **2010**, *76*, 2212-2217.
- 529 58. Dunfield, K.E.; King, G.M. Molecular analysis of carbon monoxide-oxidizing bacteria  
530 associated with recent Hawaiian volcanic deposits. *Appl. Environ. Microbiol.* **2004**, *70*, 4242-  
531 4248.
- 532 59. Cavaletti, L.; Monciardini, P.; Bamonte, R.; Schumann, P.; Rohde, M.; Sosio, M.; et al. New  
533 lineage of filamentous, spore-forming, Gram-positive bacteria from Soil. *Appl. Environ.*  
534 *Microbiol.* **2006**, *72*, 4360-4369.
- 535 60. Yabe, S.; Sakai, Y.; Abe, K.; Yokota, A.; Také, A.; Matsumoto, A.; et al. *Dictyobacter*  
536 *aurantiacus* gen. nov., sp. nov., a member of the family Ktedonobacteraceae, isolated from  
537 soil, and emended description of the genus *Thermosporothrix*. *Int. J. Syst. Evol. Microbiol.*  
538 **2017**, *67*, 2615-2621.
- 539 61. Yabe, S.; Aiba, Y.; Sakai, Y.; Hazaka, M.; Yokota, A. *Thermosporothrix hazakensis* gen. nov.,  
540 sp. nov., isolated from compost and description of Thermosporotrichaceae fam. nov. within  
541 the class Ktedonobacteria. *Int. J. Syst. Evol. Microbiol.* **2010**, *60*, 1794-1801.
- 542 62. Yabe, S.; Sakai, Y.; Yokota, A. *Thermosporothrix narukonensis* sp. nov., belonging to the class  
543 Ktedonobacteria, isolated from fallen leaves on geothermal soil, and emended description  
544 of the genus *Thermosporothrix*. *Int. J. Syst. Evol. Microbiol.* **2016**, *66*, 2152-2157.
- 545 63. Yan, B.; Guo, X.; Liu, M.; Huang, Y. *Ktedonosporobacter rubrisoli* gen. nov., sp. nov., a novel  
546 representative of the class Ktedonobacteria, isolated from red soil, and proposal of  
547 Ktedonosporobacteraceae fam. nov. *Int. J. Syst. Evol. Microbiol.* **2020**, *70*, 1015-1025.
- 548 64. Wang, C.M.; Zheng, Y.; Sakai, Y.; Toyoda, A. Minakuchi, Y.; Abe, K.; et al. *Tengunoibacter*  
549 *tsumagoiensis* gen. nov., sp. nov., *Dictyobacter kobayashii* sp. nov., *Dictyobacter alpinus* sp.  
550 nov., and description of Dictyobacteraceae fam. nov. within the order Ktedonobacterales

- 551 isolated from Tengu-no-mugimeshi, a soil-like granular mass of microorganisms, and  
552 emended descriptions of the genera *Ktedonobacter* and *Dictyobacter*. *Int. J. Syst. Evol.*  
553 *Microbiol.* **2019**, *69*, 1910-1918.
- 554 65. Zheng, Y.; Wang, C.M.; Sakai, Y.; Abe, K.; Yokota, A.; et al. *Thermogemmatispora aurantia* sp.  
555 nov. and *Thermogemmatispora argillosa* sp. nov., within the class Ktedonobacteria, and  
556 emended description of the genus *Thermogemmatispora*. *Int. J. Syst. Evol. Microbiol.* **2019**, *69*,  
557 1744-1750.
- 558 66. Yabe, S.; Aiba, Y.; Sakai, Y.; Hazaka, M.; Yokota, A. *Thermogemmatispora onikobensis* gen.  
559 nov., sp. nov. and *Thermogemmatispora foliorum* sp. nov., isolated from fallen leaves on  
560 geothermal soils, and description of Thermogemmatisporaceae fam. nov. and  
561 Thermogemmatisporales ord. nov. within the class Ktedonobacteria. *Int. J. Syst. Evol.*  
562 *Microbiol.* **2011**, *61*, 903-910.
- 563 67. Greening, C.; Biswas, A.; Carere, C. R.; Jackson, C. J.; Taylor, M. C.; Stott, M. B.; et al.  
564 Genomic and metagenomic surveys of hydrogenase distribution indicate H<sub>2</sub> is a widely  
565 utilised energy source for microbial growth and survival. *ISME J.* **2016**, *10*, 761-777.
- 566 68. Sato, Y.; Nishihara, H.; Yoshida, M.; Watanabe, M.; Rondal, J.D.; Concepcion, R.N.; et al.  
567 *Cupriavidus pinatubonensis* sp. nov. and *Cupriavidus laharis* sp. nov., novel hydrogen-  
568 oxidizing, facultatively chemolithotrophic bacteria isolated from volcanic mudflow  
569 deposits from Mt. Pinatubo in the Philippines. *Int. J. Syst. Evol. Microbiol.* **2006**, *56*, 973-978.
- 570  
571
